# Supplementary material for: Influence of the Arrangement of Surgical Light Axes on the Air Environment in Operating Rooms
Source: Hindawi journal article supplement (doi:10.1155/2019/4861273), 2019-03-26

# Figure 1s. Air current direction and velocity in the central sagittal plane

## 【Single-axis room】

velocity (cm/s)

## 【Double-axis room】

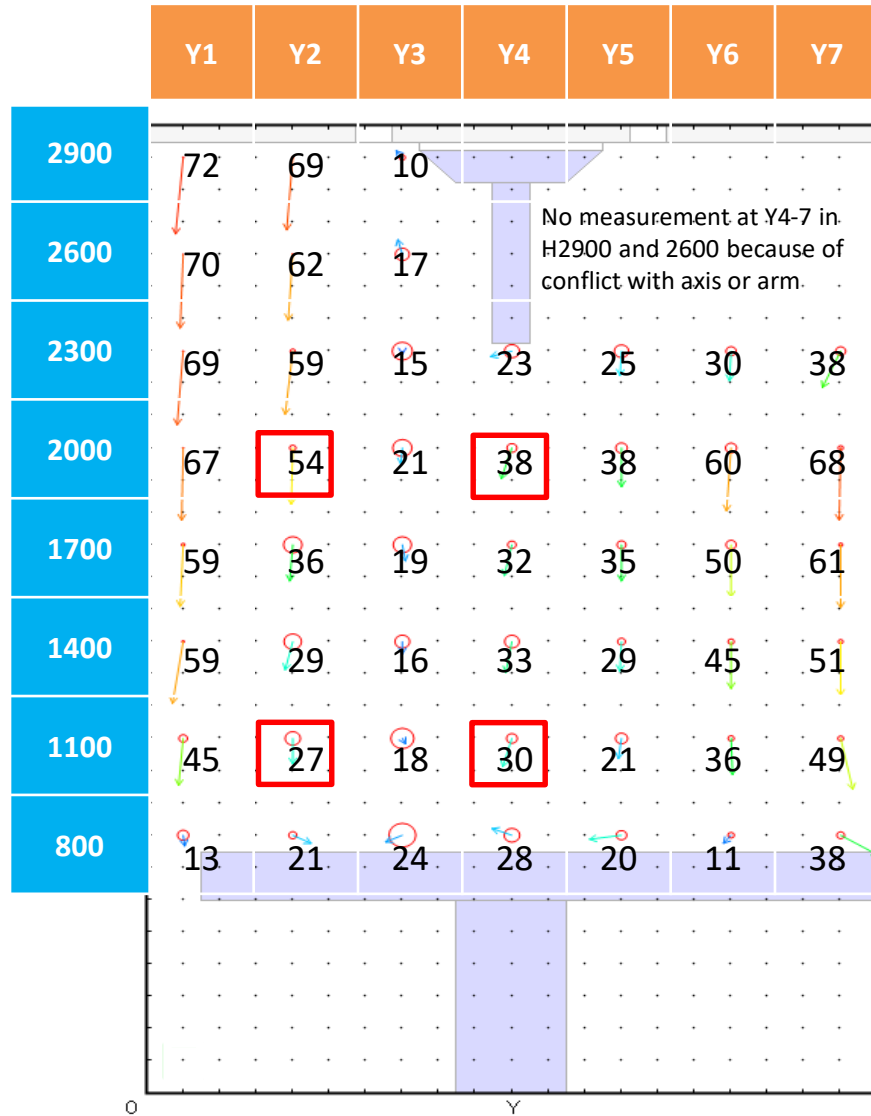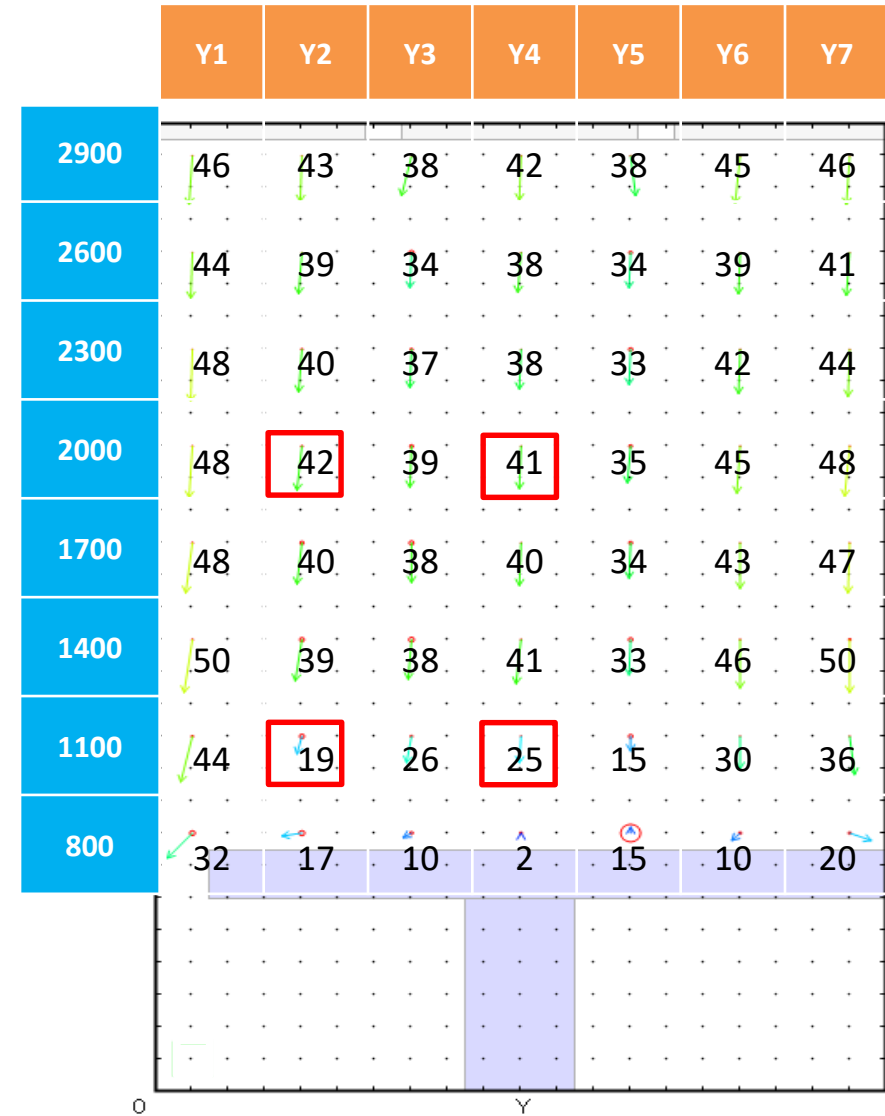

Figure 2s. Air current direction and velocity in the central coronal plane

【Single-axis room】

velocity (cm/s)

【Double-axis room】

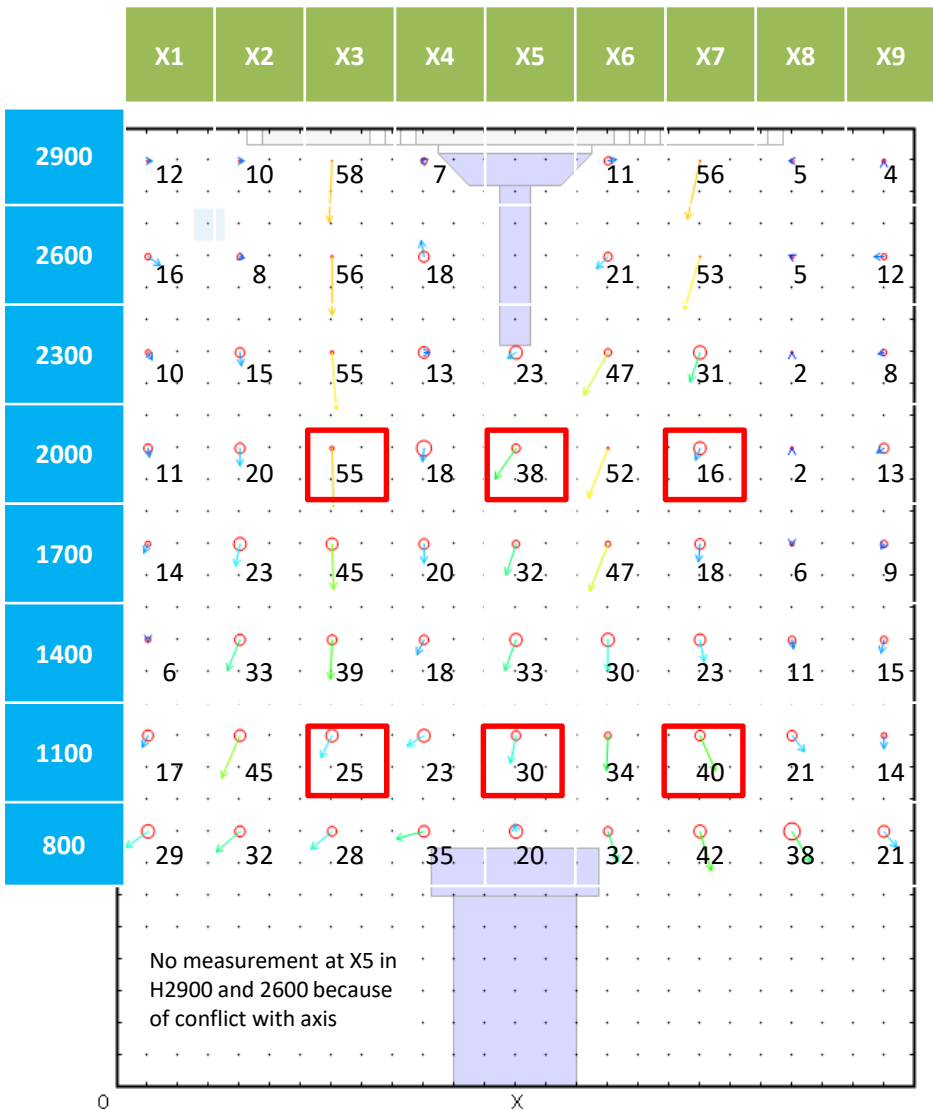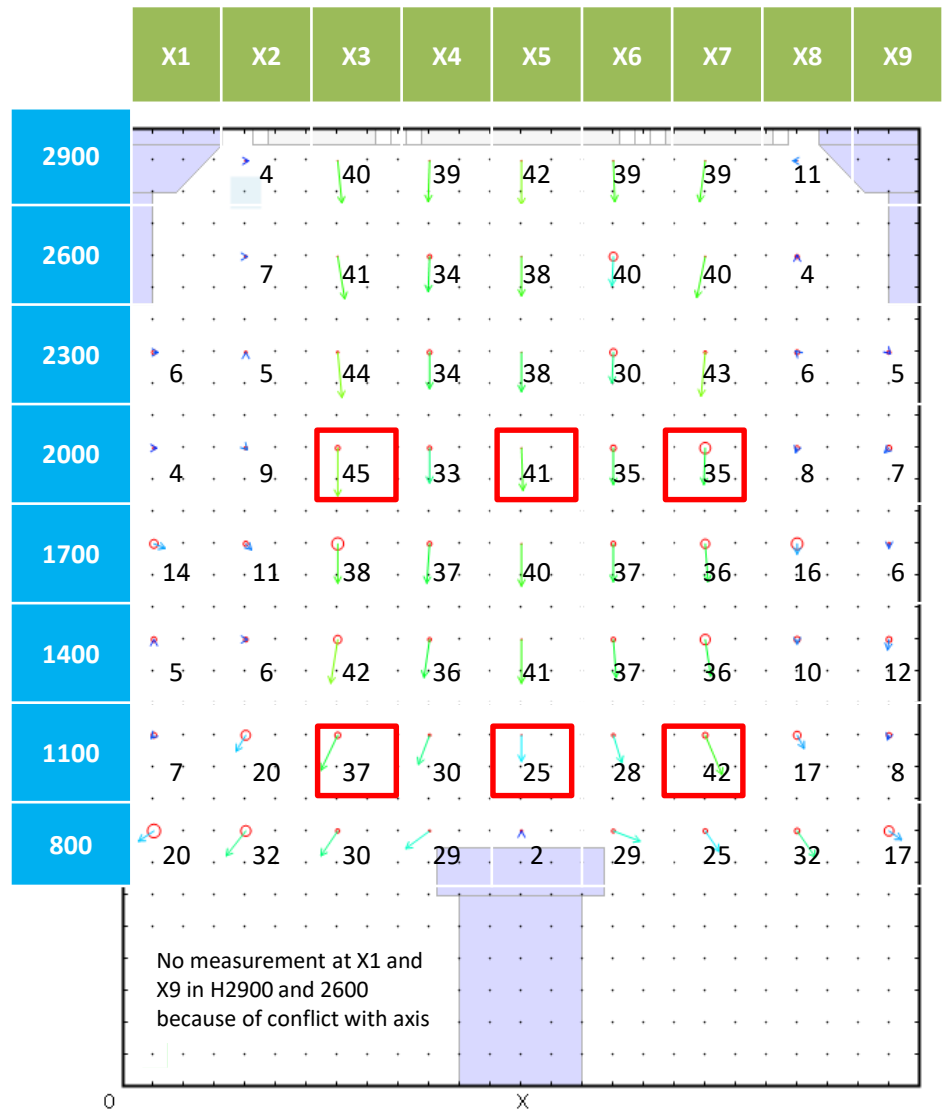

**Figure 3s.** Air current direction and velocity at a height of 2,900 mm

velocity (cm/s)

【Single-axis room】

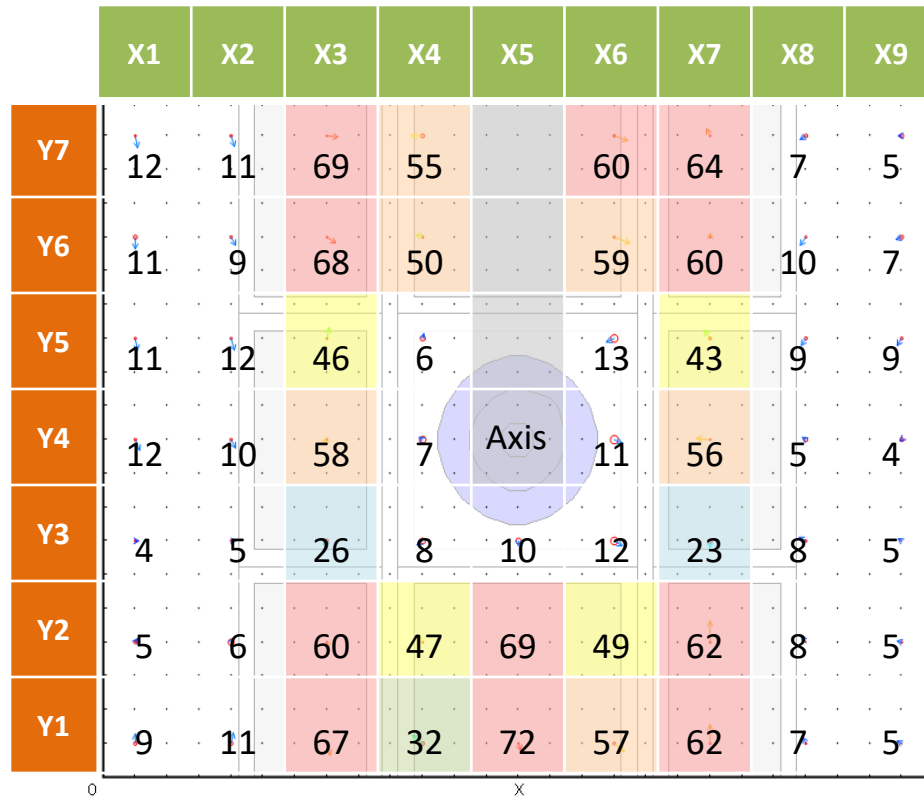

【Double-axis room】

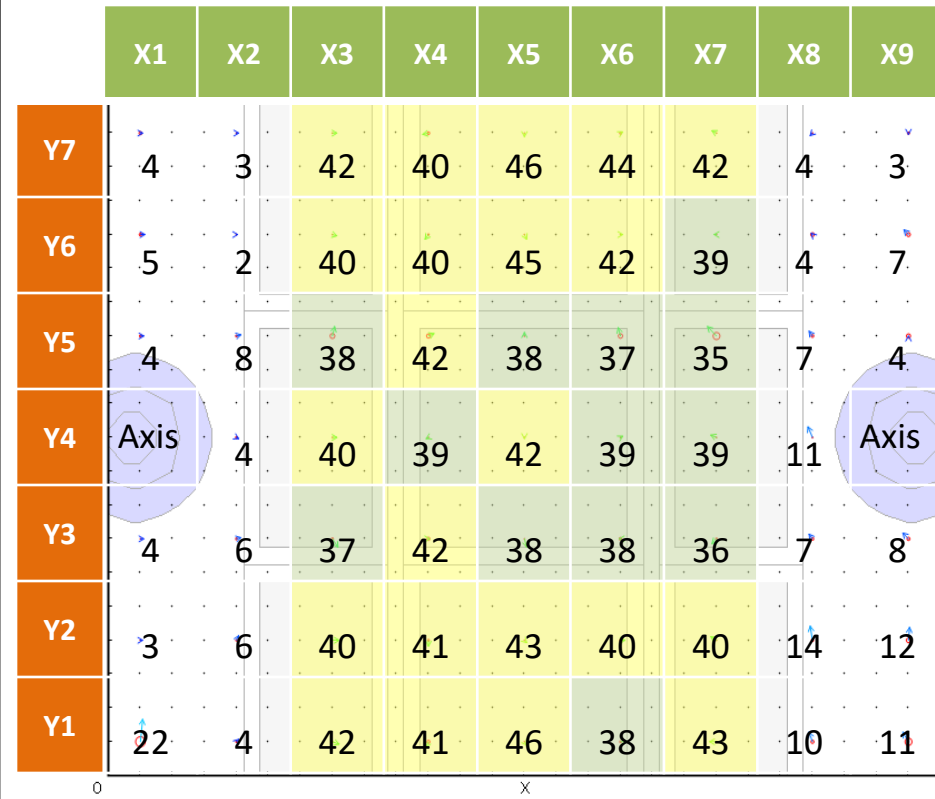

**Figure 4s.** Air current direction and velocity at a height of 2,000 mm

velocity (cm/s)

【Single-axis room】

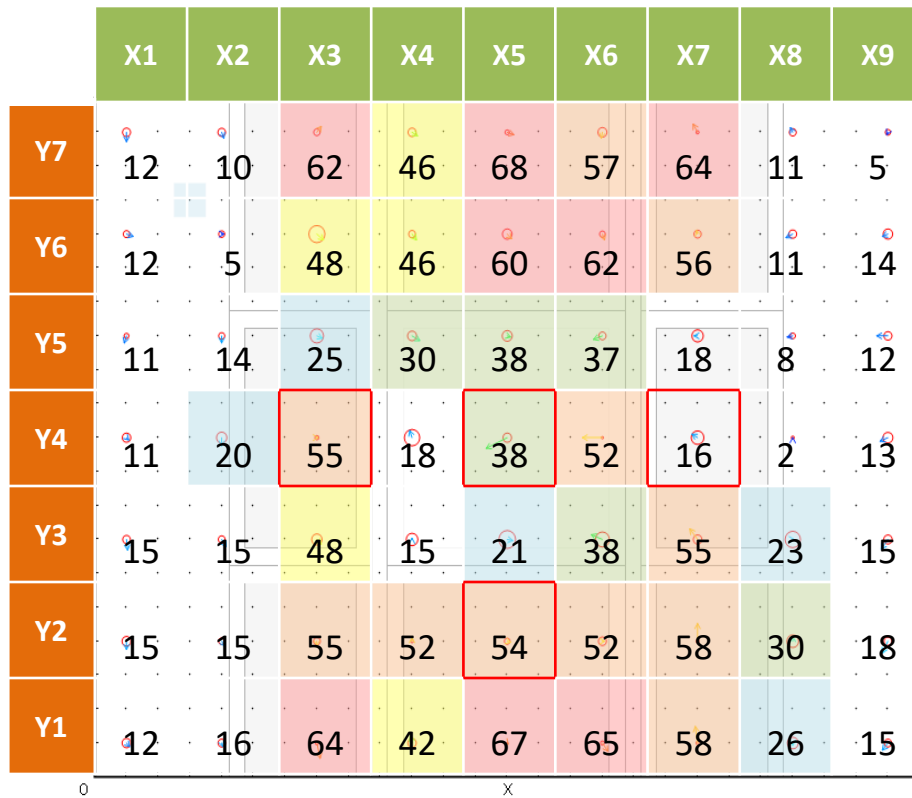

【Double-axis room】

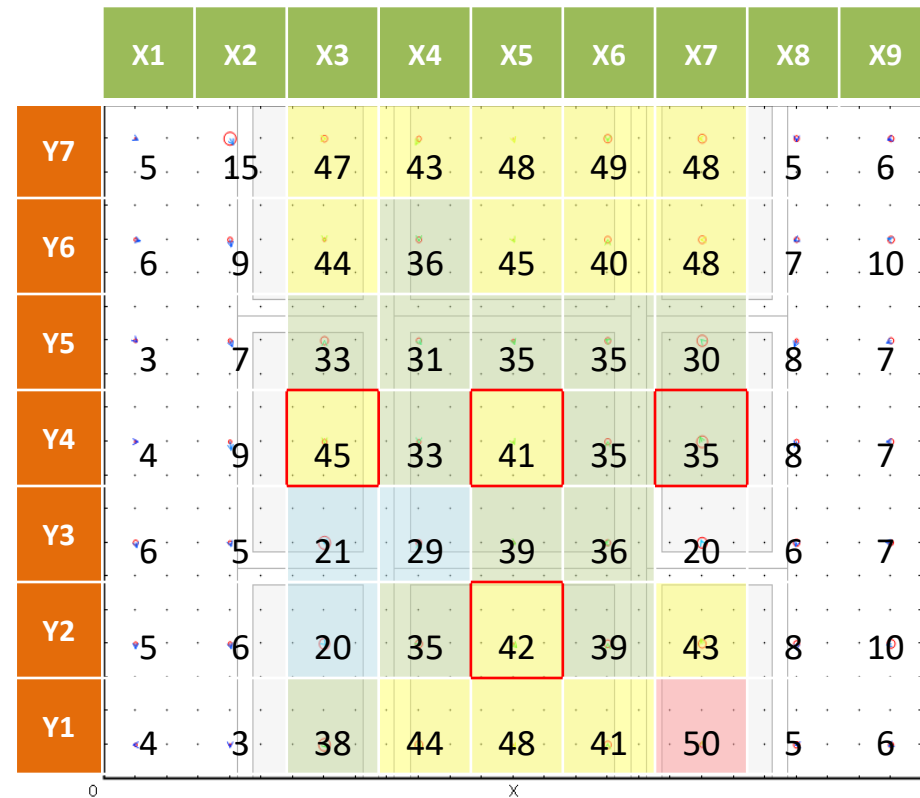

**Figure 5s. Air current direction and velocity at a height of 1,100 mm**

velocity (cm/s)

【Single-axis room】

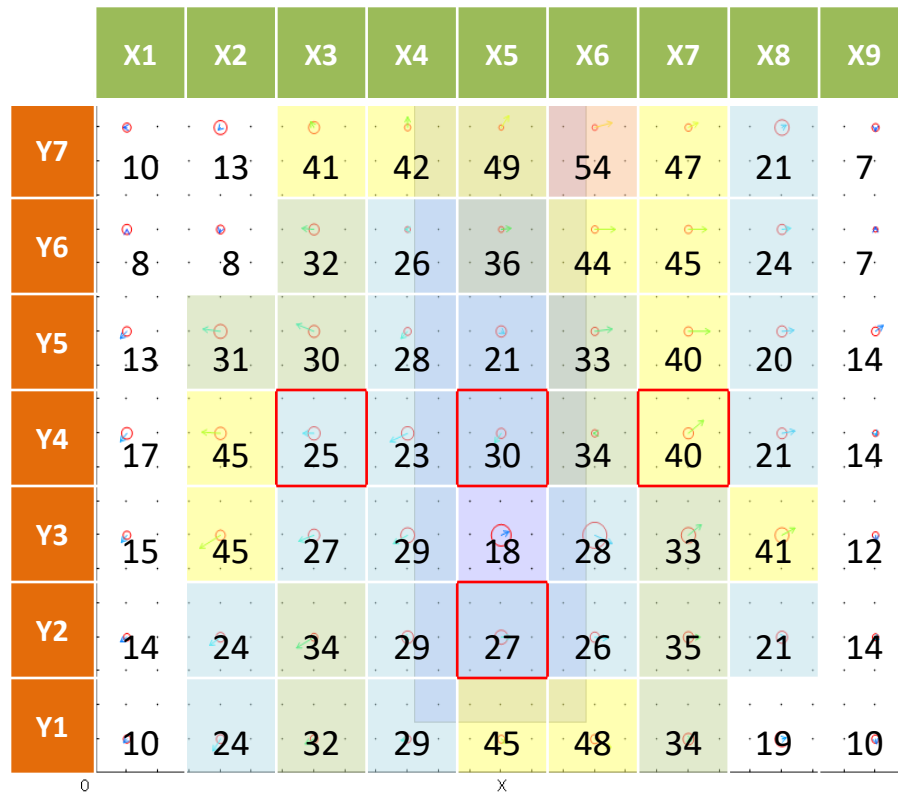

【Double-axis room】

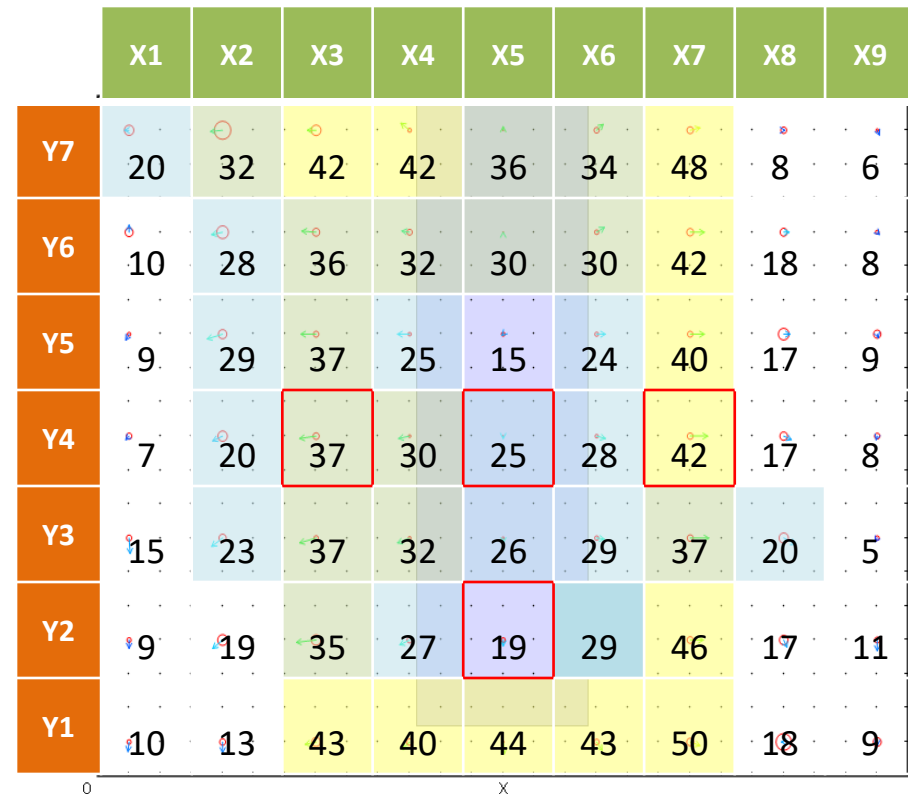

Supplement: f1 [file 4861273.f1.pdf]
