# Supplementary material for: Influence of the Arrangement of Surgical Light Axes on the Air Environment in Operating Rooms
Source: Hindawi journal article supplement (doi:10.1155/2019/4861273), 2019-03-26

**Picture 1s.** Velocity measurement in double-axis room

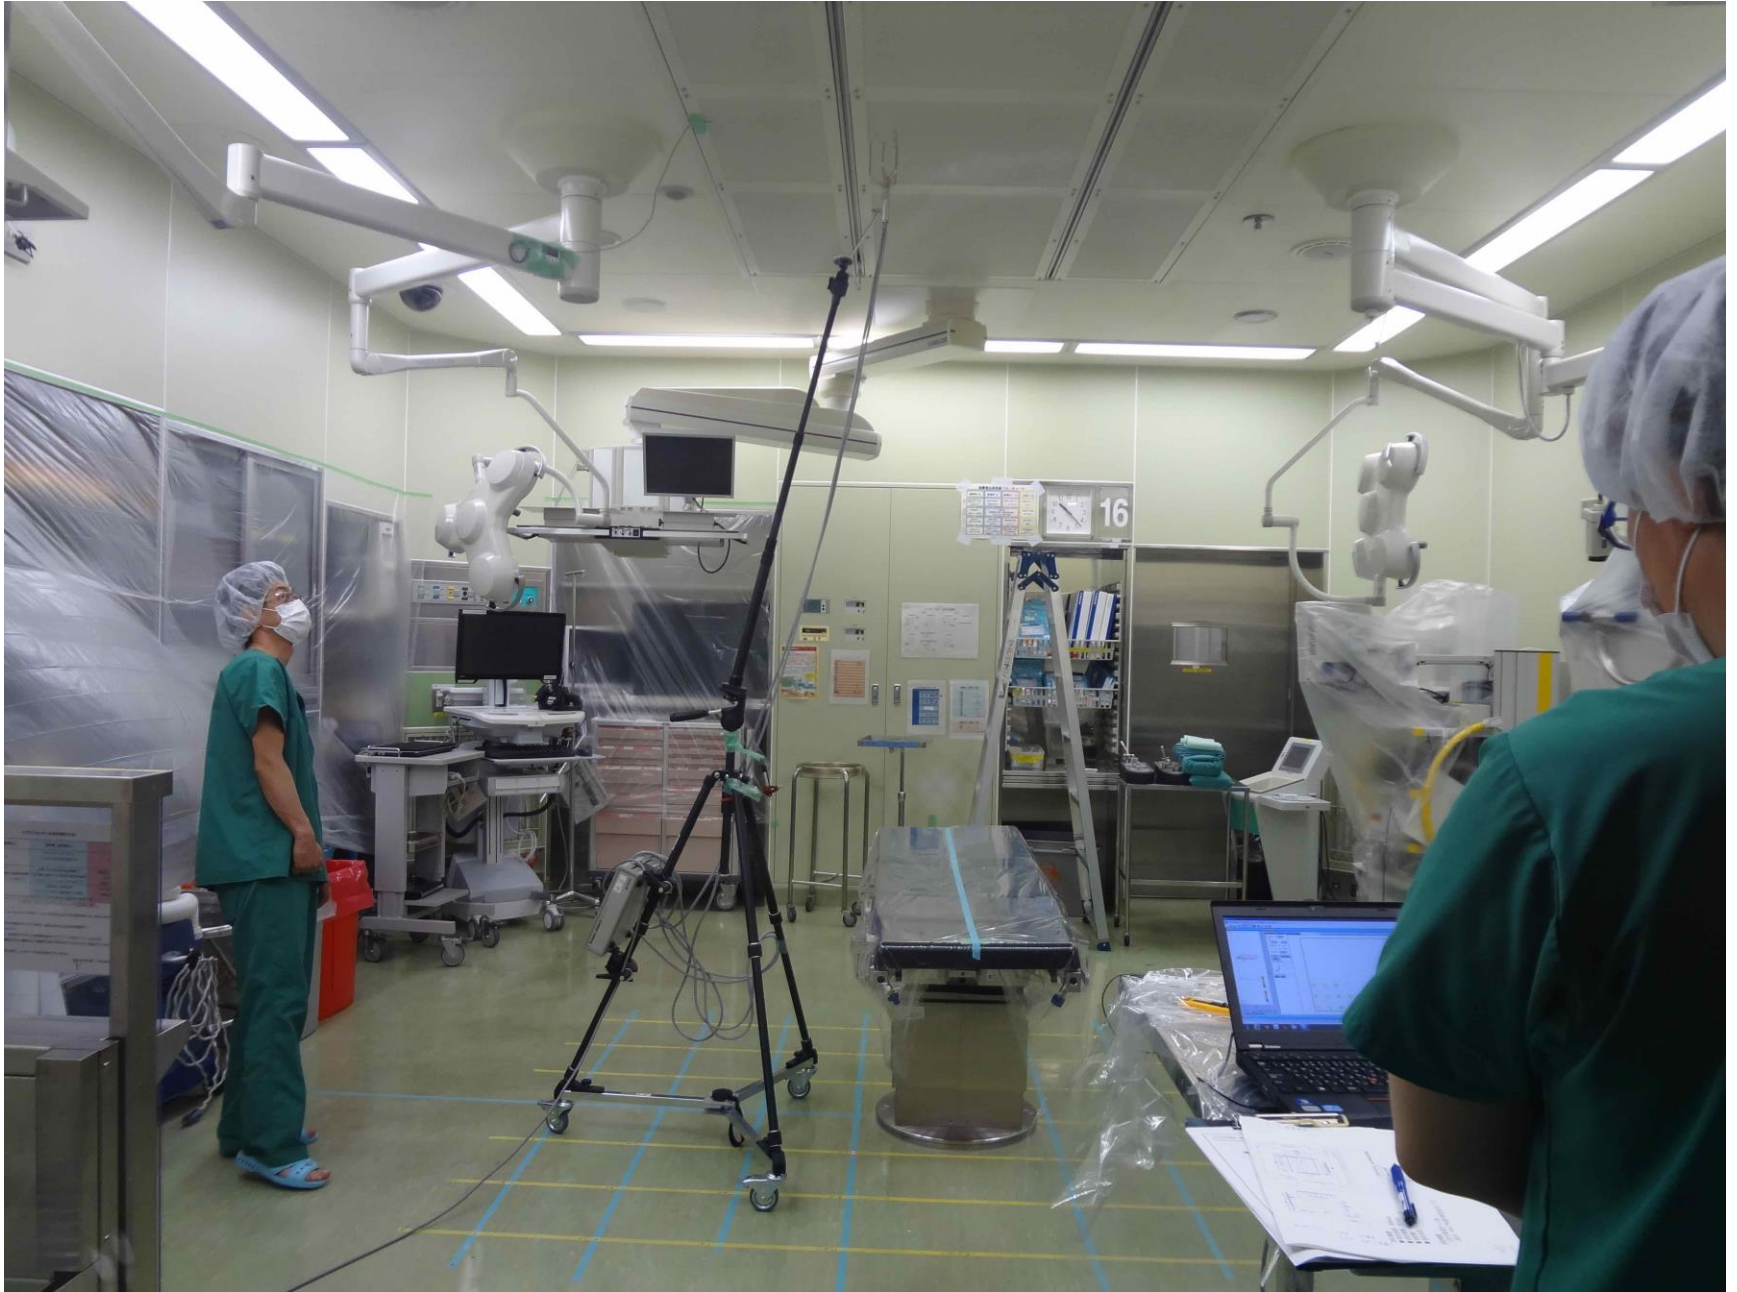

**Picture 2s.** Cleanliness assessment in single-axis room

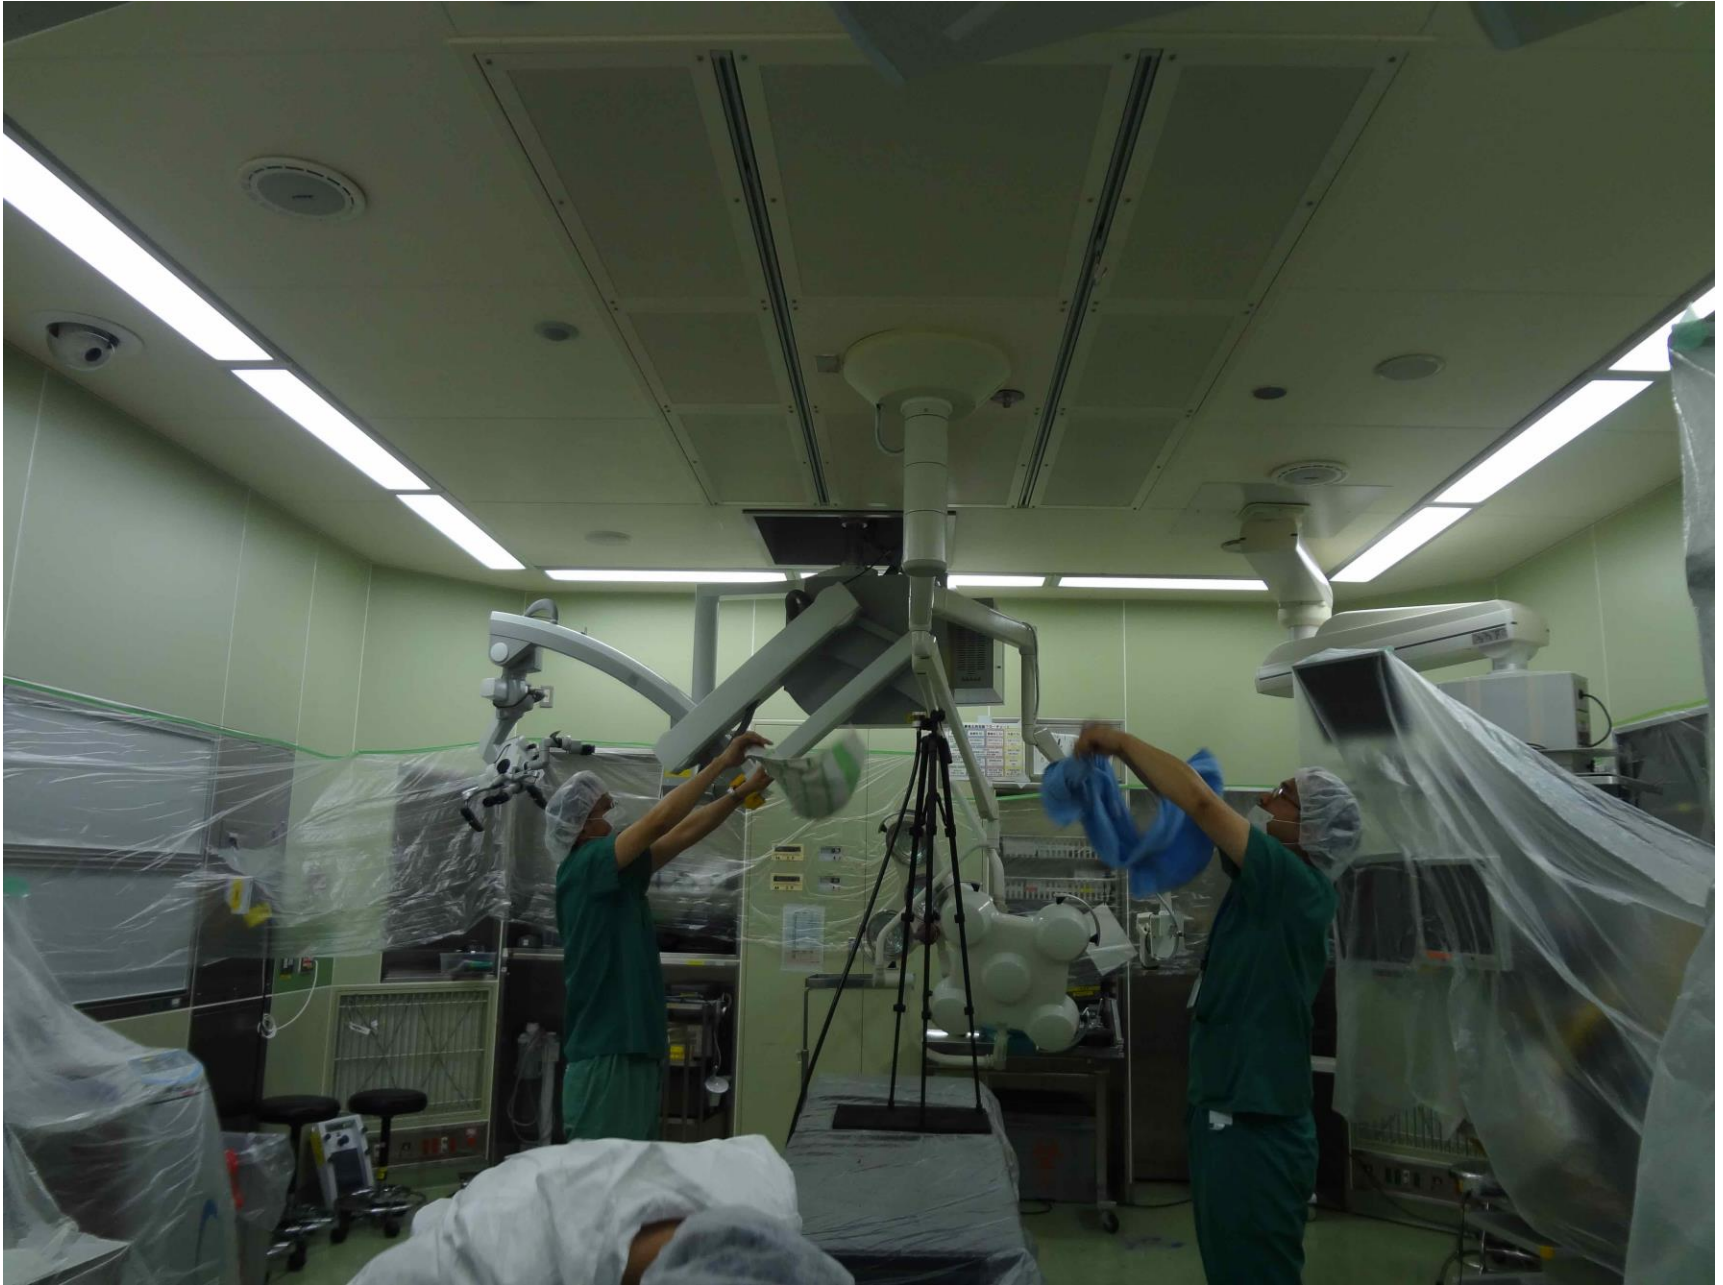



**Picture 3s.** Preparation for air current visualization in single-axis room

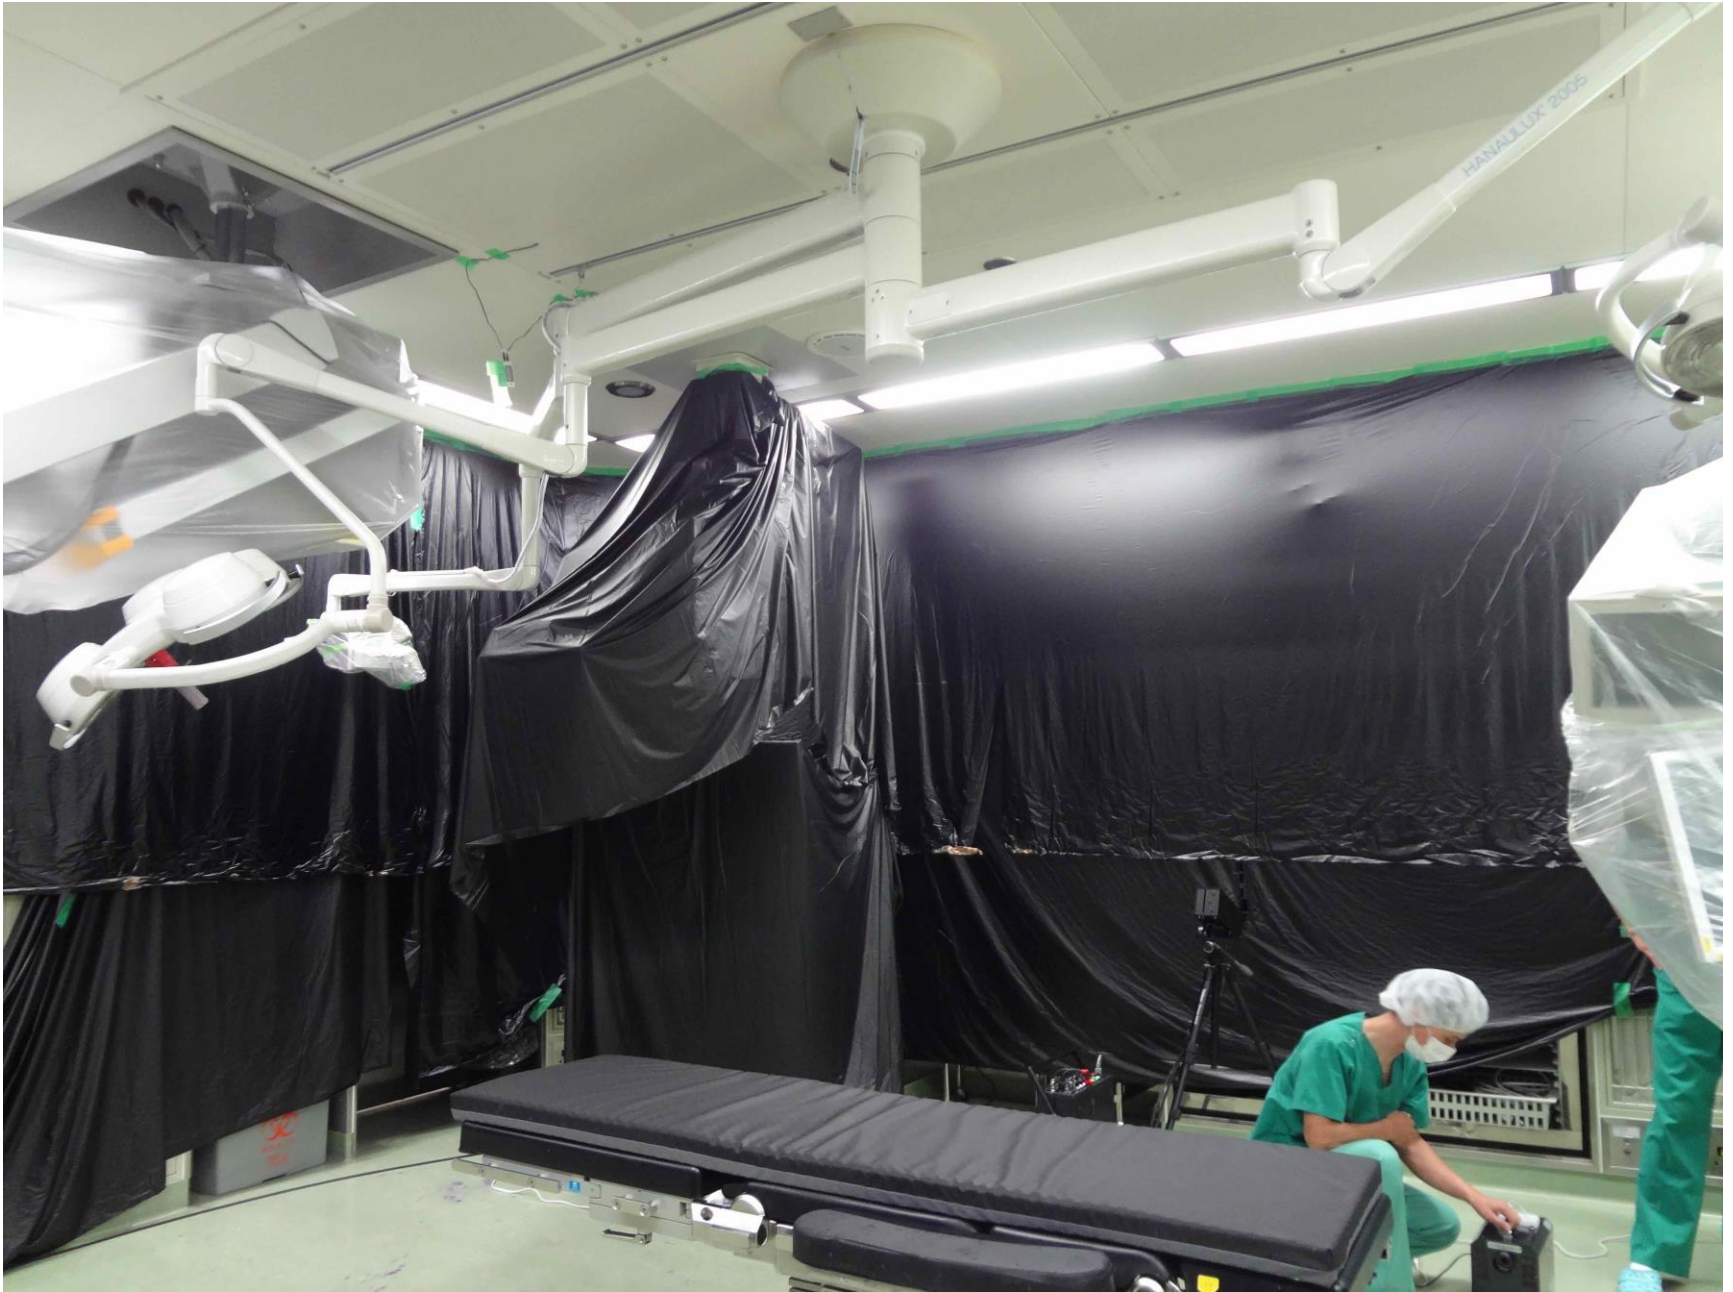

**Picture 4s.** Preparation for air current visualization in double-axis room with lights in position

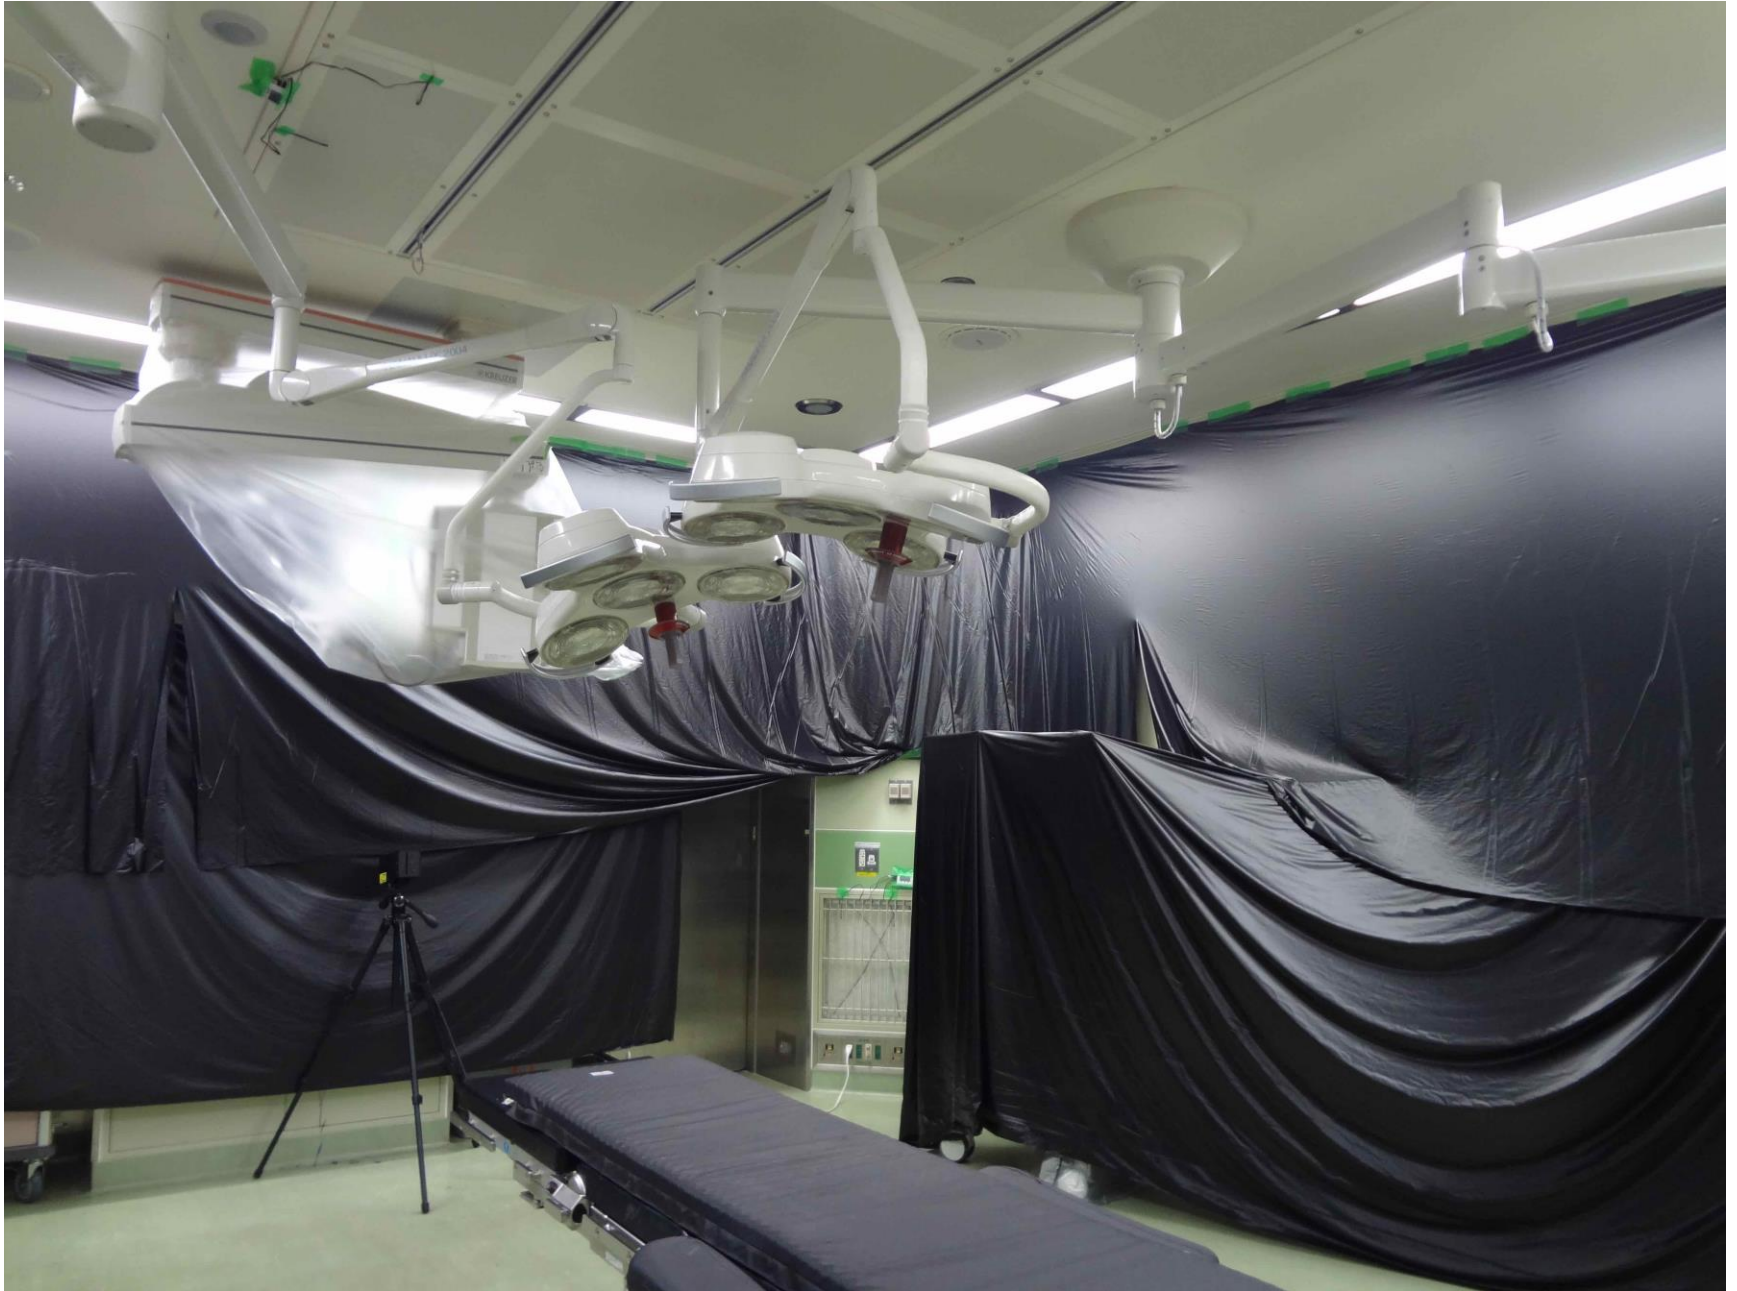

Supplement: f3 [file 4861273.f3.pdf]
